# Supplementary material for: Domestication-driven changes in plant traits associated with changes in the assembly of the rhizosphere microbiota in tetraploid wheat
Source: PubMed Central journal article supplement (PMC7376052; doi:10.1038/s41598-020-69175-9), 2020-07-22

Supplementary Information for

**Domestication-driven changes in plant traits associated with changes in  
the assembly of the rhizosphere microbiota in tetraploid wheat**

*Authors:* Aymé Spor<sup>1\*#</sup>, Agathe Roucou<sup>2,3\*</sup>, Arnaud Mounier<sup>4</sup>, David Bru<sup>1</sup>, Marie-Christine Breuil<sup>1</sup>, Florian Fort<sup>5</sup>, Denis Vile<sup>2</sup>, Pierre Roumet<sup>6</sup>, Laurent Philippot<sup>1#</sup> and Cyrille Violle<sup>2</sup>

**#Corresponding authors:** A. Spor: ayme.spor@inrae.fr & L. Philippot: laurent.philippot@inrae.fr

**This PDF file includes:**

Figures S1 to S3  
Tables S1

## Supplementary Figure legends

**Fig. S1.** Impact of the rhizosphere environment on bacterial and fungal communities composition. Constrained analyses of principal coordinates of bacterial (a) and fungal (b) communities. Black and red dots correspond to bulk and rhizosphere samples, respectively. (c) mean (and s.e) OTU counts of bacterial and fungal classes enriched in the rhizosphere (blue bars) compared to bulk soil (red bars) (ANOVA,  $p < 0.05$ ). (d) mean (and s.e) OTU counts of bacterial and fungal classes depleted in the rhizosphere (blue bars) compared to bulk soil (red bars) (ANOVA,  $p < 0.05$ ).

**Fig. S2.** Impact of domestication on fungal communities composition. (a) Fungal OTUs displaying the type-1 (a) and the type-2 (b) patterns. Black, blue, white and red dots correspond to *dicoccoides*, *dicoccum*, *durum* elite varieties and *durum* landraces, respectively. Mean and standard errors are represented.

**Fig. S3.** (a) Bacterial cooccurrence network across the bulk soil samples. Edges indicate positive (green) or negative correlations (red) as defined by Spearman's correlation  $|\rho| > 0.6$ . Node colors differ according to OTUs phylum assignment. (b) Venn diagram illustrating the number of nodes shared across the four domestication groups and the bulk soil bacterial cooccurrence networks.

**Table S1. List of the 40 tetraploid wheat accessions used in this study.**

| <b>Sub-species</b>                                                                            | <b>N</b>                                                                                | <b>Collection</b>   |       |
|-----------------------------------------------------------------------------------------------|-----------------------------------------------------------------------------------------|---------------------|-------|
| <i>T. turgidum</i> ssp. <i>dicoccoides</i><br>(ancestral form)                                | 46499                                                                                   | ICARDA              |       |
|                                                                                               | 46491                                                                                   | ICARDA              |       |
|                                                                                               | 46323                                                                                   | ICARDA              |       |
|                                                                                               | 46309                                                                                   | ICARDA              |       |
|                                                                                               | 46310                                                                                   | ICARDA              |       |
|                                                                                               | 46501                                                                                   | ICARDA              |       |
|                                                                                               | 46453                                                                                   | ICARDA              |       |
|                                                                                               | 46253                                                                                   | ICARDA              |       |
|                                                                                               | 467014                                                                                  | USDA                |       |
|                                                                                               | 352324                                                                                  | USDA                |       |
| <i>T. turgidum</i> ssp. <i>dicoccum</i><br>(first domesticated form)                          | 45383                                                                                   | ICARDA              |       |
|                                                                                               | 45351                                                                                   | ICARDA              |       |
|                                                                                               | 45239                                                                                   | ICARDA              |       |
|                                                                                               | 45354                                                                                   | ICARDA              |       |
|                                                                                               | 45280                                                                                   | ICARDA              |       |
|                                                                                               | 45441                                                                                   | ICARDA              |       |
|                                                                                               | 352365                                                                                  | USDA                |       |
|                                                                                               | 319868                                                                                  | USDA                |       |
|                                                                                               | cwi17084                                                                                | CIMMYT              |       |
| 415152                                                                                        | USDA                                                                                    |                     |       |
| <i>T. turgidum</i> ssp. <i>durum</i><br>(Landrace)<br>(durum wheat before Green<br>Revoluton) | 495                                                                                     | INRA<br>Montpellier |       |
|                                                                                               | 84866                                                                                   | ICARDA              |       |
|                                                                                               | 97512                                                                                   | ICARDA              |       |
|                                                                                               | 95920                                                                                   | ICARDA              |       |
|                                                                                               | 82697                                                                                   | ICARDA              |       |
|                                                                                               | 82702                                                                                   | ICARDA              |       |
|                                                                                               | 82768                                                                                   | ICARDA              |       |
|                                                                                               | 82715                                                                                   | ICARDA              |       |
|                                                                                               | 82726                                                                                   | ICARDA              |       |
|                                                                                               | (maria)B6R                                                                              | 580                 |       |
|                                                                                               | <i>T. turgidum</i> ssp. <i>durum</i> (Elite)<br>(durum wheat after Green<br>Revolution) | AGATHE              | GEVES |
|                                                                                               |                                                                                         | BRUMAIRE            | GEVES |
|                                                                                               |                                                                                         | DURGAMM             | GEVES |
| NITA                                                                                          |                                                                                         | GEVES               |       |
| ROMEO                                                                                         |                                                                                         | GEVES               |       |
| PRIMADUR                                                                                      |                                                                                         | GEVES               |       |
| ARBOIS                                                                                        | GEVES                                                                                   |                     |       |

|          |       |
|----------|-------|
| NEODUR   | GEVES |
| IXOS     | GEVES |
| DURENTAL | GEVES |

---

ICARDA (International Center for Agricultural Research in the Dry Areas) Beirut, Lebanon.

USDA-ARS (US Department of Agriculture) National Small Grains, wheat collection, USA.

CIMMYT (International Maize and Wheat Improvement Center), Mexico

GEVES (French Group for the Study and Control of Varieties and Seeds), France

INRA (French National Institute of Agricultural Research) wheat collection, Montpellier

Supp figure 1.

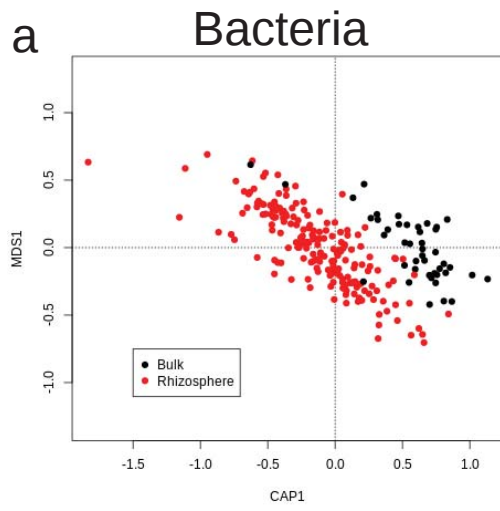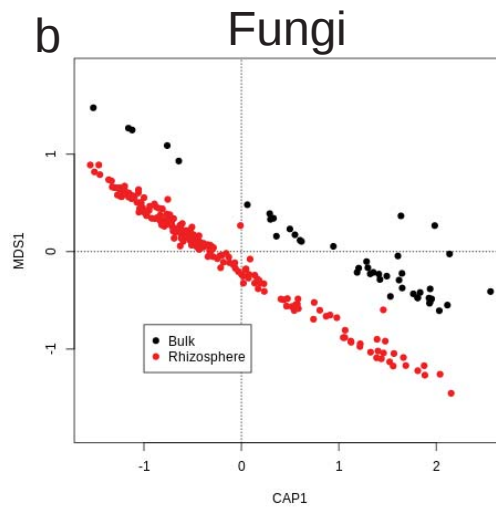

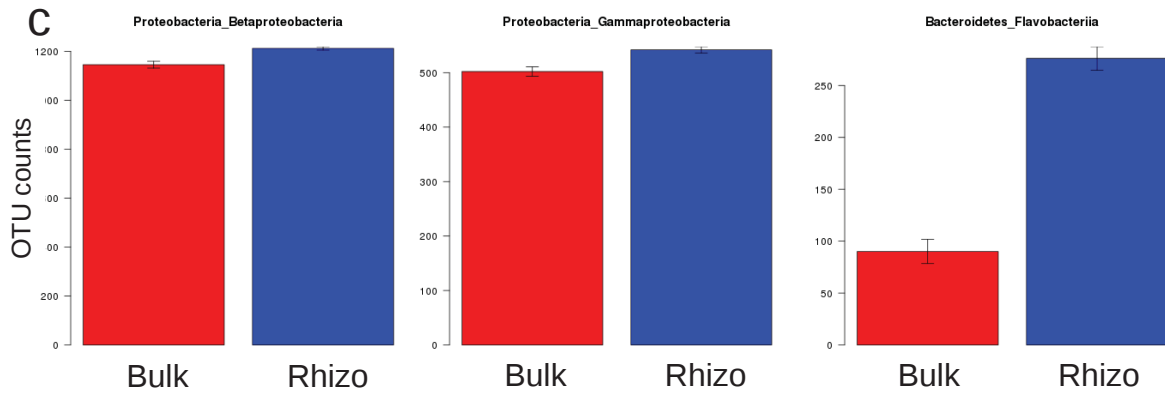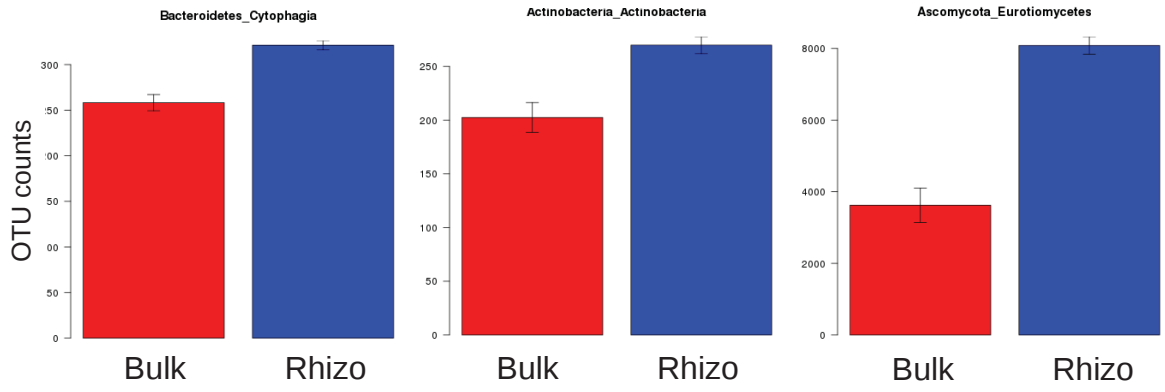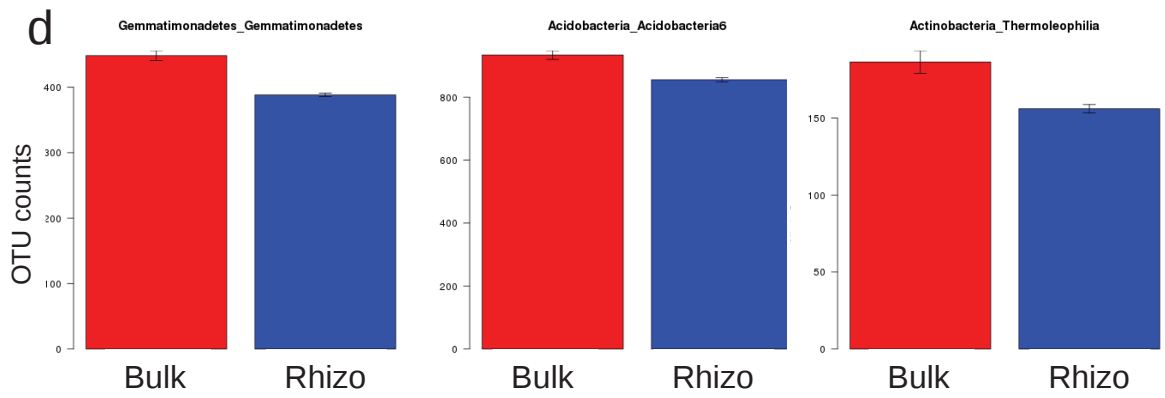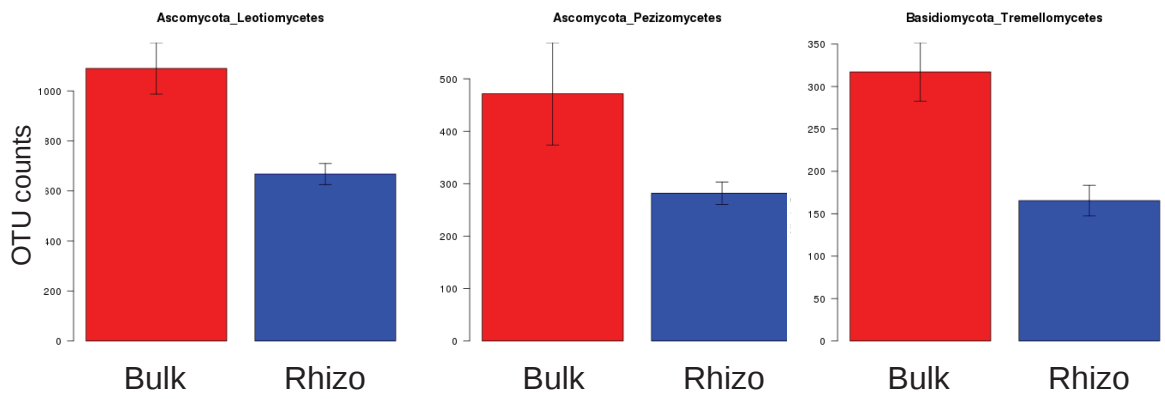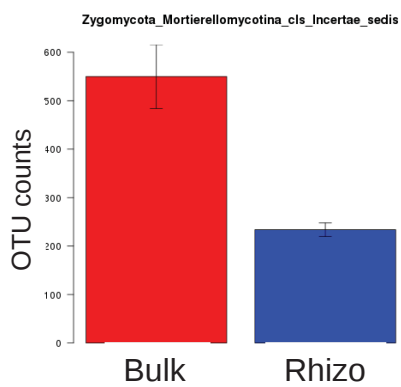

# Supp figure 2.

a

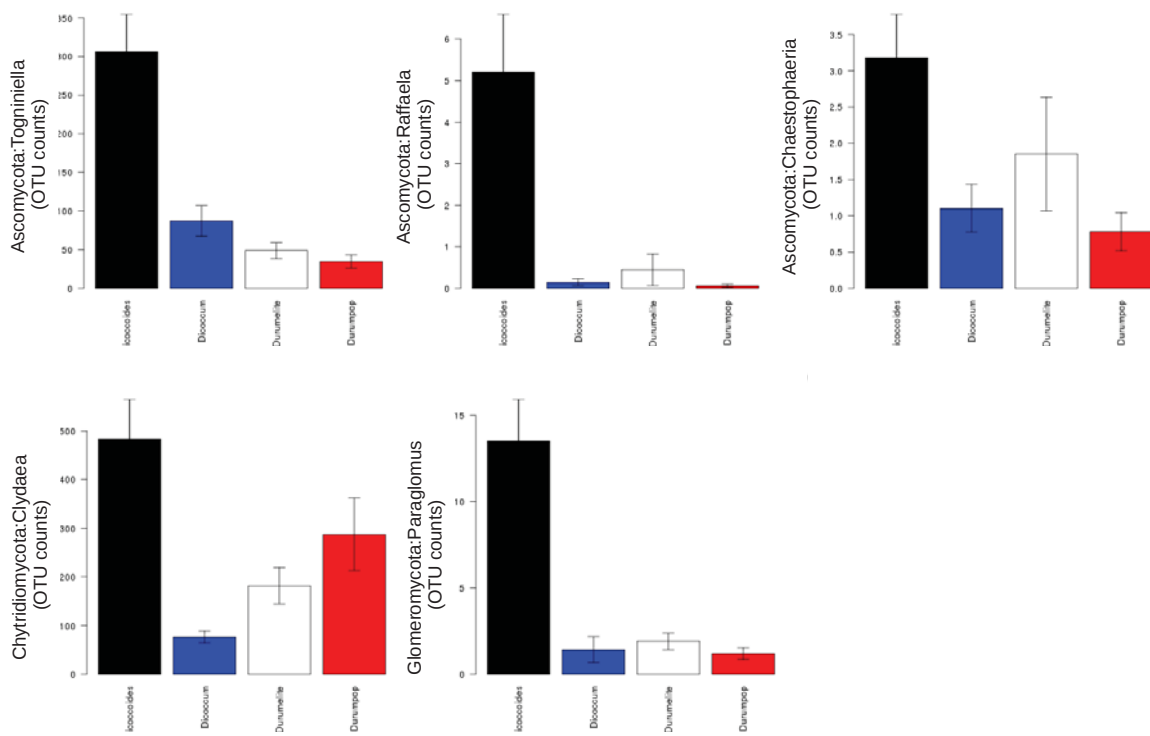

b

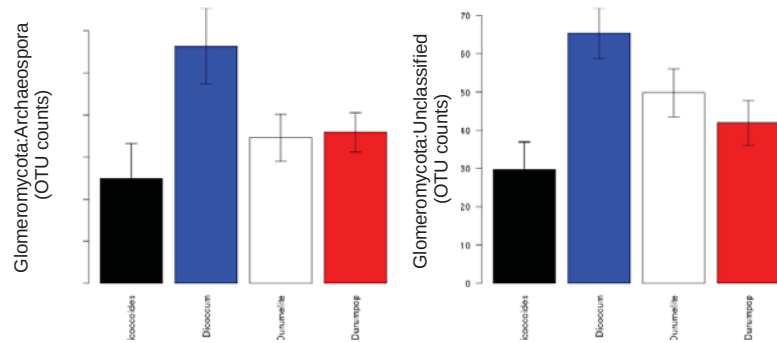

# Supp figure 3.

a

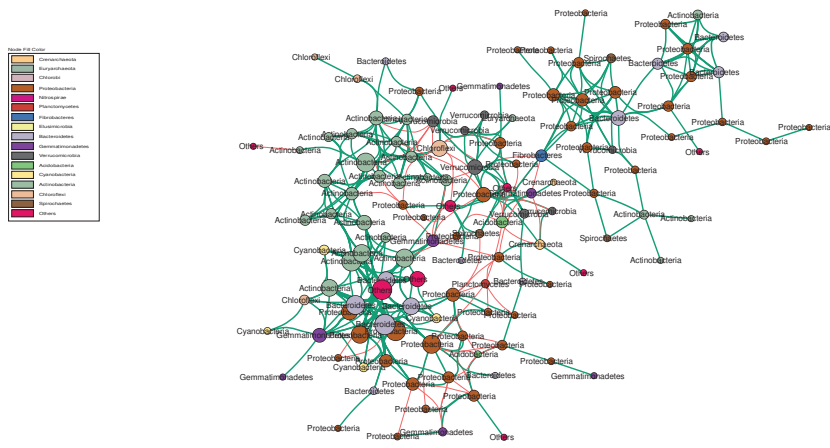

b

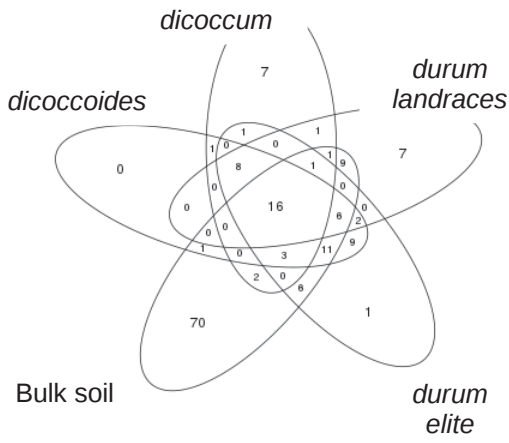

Supplement: 41598_2020_69175_MOESM1_ESM.pdf [file 41598_2020_69175_MOESM1_ESM.pdf]
